# Supplementary material for: Enhancement of diffusion kinetics in porous MoN nanorods-based counter electrode in a dye-sensitized solar cell
Source: Royal Society of Chemistry journal article supplement (doi:10.1039/c4ta01342e), 2014-01-01
Supplement: c4ta01342e1.pdf [file c4ta01342e1.pdf]

Electronic Supplementary Material (ESI) for  
**Enhancement of diffusion kinetics in porous MoN nanorods based  
counter electrode in a dye-sensitized solar cell**

J. Song<sup>a</sup>, G. R. Li<sup>a,b\*</sup>, Kai Xi<sup>b</sup>, B. Lei<sup>a</sup>, X. P. Gao<sup>a\*</sup> and R. Vasant Kumar<sup>b</sup>

<sup>a</sup>Institute of New Energy Material Chemistry, Collaborative Innovation Center of Chemical Science and Engineering (Tianjin),  
Tianjin Key Laboratory of Metal and Molecule Based Material Chemistry, Nankai University, Tianjin 300071, China  
Fax: +86-22-23500876; Tel: +86-22-23500876.

E-mail address: [guoranli@nankai.edu.cn](mailto:guoranli@nankai.edu.cn); [xpgao@nankai.edu.cn](mailto:xpgao@nankai.edu.cn)

<sup>b</sup>Department of Materials Science and Metallurgy, University of Cambridge, Cambridge CB3 0FS, United Kingdom

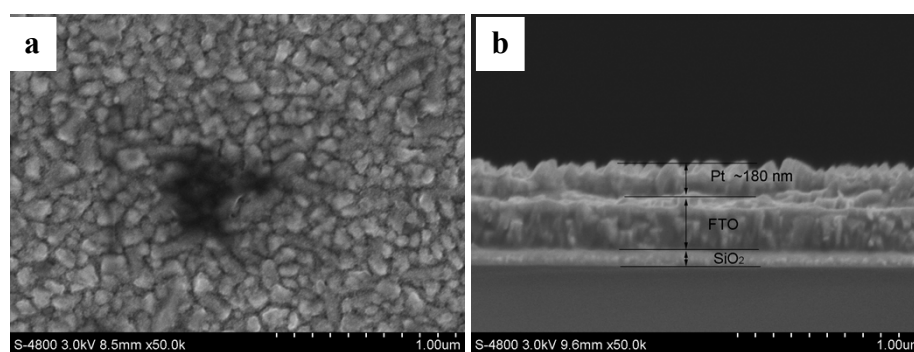

**Figure 1S.** Surface (a) and cross (b) SEM images of Pt-FTO electrode.

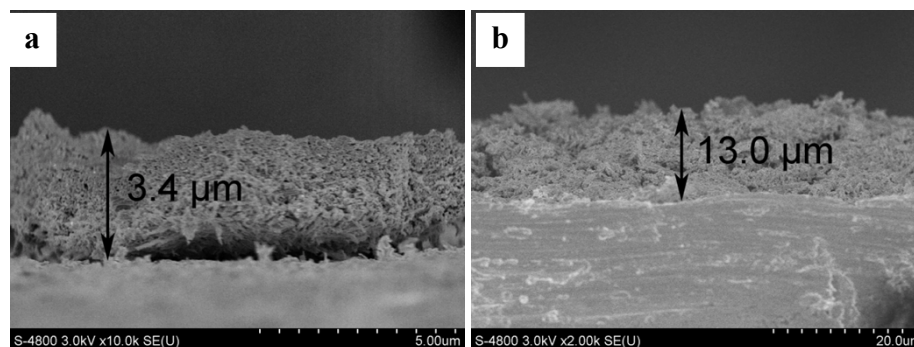

**Figure 2S.** Cross-section SEM images of MoN NR-Ti electrodes with different film thickness: (a) 3.4 μm and (b) 13.0 μm.

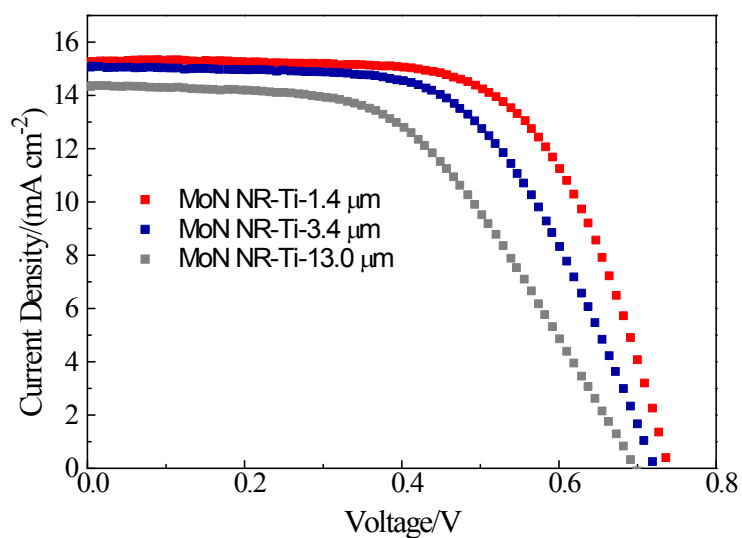

**Figure 3 S.**  $J$ - $V$  curves of DSSCs using MoN NR-Ti counter electrodes with different film thicknesses: 1.4  $\mu\text{m}$ , 3.4  $\mu\text{m}$  and 13.0  $\mu\text{m}$ .

**Table S1.** The photovoltaic parameters of DSSCs using MoN NR-Ti counter electrodes with different film thicknesses

| Sample                       | $V_{oc}$ (V) | $J_{sc}$ ( $\text{mA}\cdot\text{cm}^{-2}$ ) | $FF$ | $\eta$ (%) |
|------------------------------|--------------|---------------------------------------------|------|------------|
| MoN NR-Ti-1.4 $\mu\text{m}$  | 0.740        | 15.26                                       | 0.65 | 7.29       |
| MoN NR-Ti-3.4 $\mu\text{m}$  | 0.725        | 15.06                                       | 0.59 | 6.43       |
| MoN NR-Ti-13.0 $\mu\text{m}$ | 0.695        | 14.34                                       | 0.52 | 5.20       |
